# Supplementary material for: Pin1 inhibition exerts potent activity against acute myeloid leukemia through blocking multiple cancer-driving pathways
Source: Springer Nature journal article supplement (doi:10.1186/s13045-018-0611-7), 2018-05-30
Supplement: MOESM3 [file 15806050]

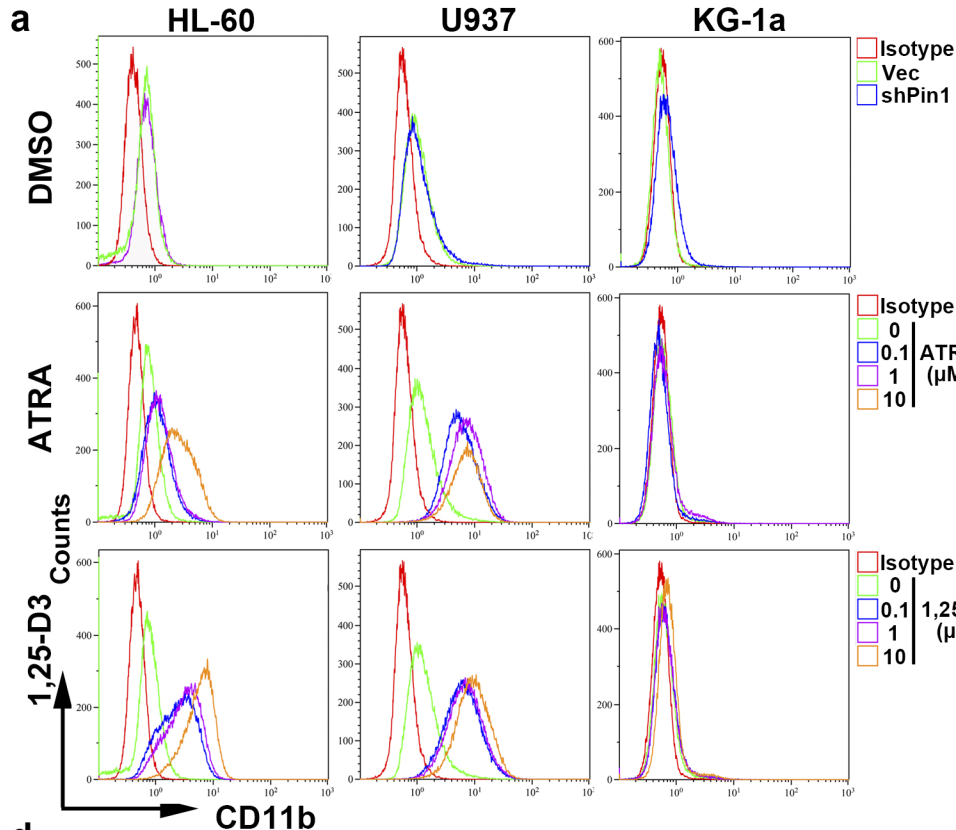

**b**

| treatment                    | HL-60      | U937 | KG-1a |
|------------------------------|------------|------|-------|
|                              | CD11b+ (%) |      |       |
| Isotype                      | 0.2        | 0.1  | 0.5   |
| Vec                          | 5.1        | 4.0  | 0.6   |
| shPin1                       | 7.6        | 7.9  | 1.5   |
| ATRA<br>( $\mu\text{M}$ )    | 0          | 10.5 | 10.0  |
|                              | 0.1        | 36.8 | 88.7  |
|                              | 1          | 43.1 | 93.1  |
|                              | 10         | 86.6 | 92.8  |
| 1,25-D3<br>( $\mu\text{M}$ ) | 0          | 10.9 | 10.4  |
|                              | 0.1        | 78.2 | 87.8  |
|                              | 1          | 86.4 | 90.7  |
|                              | 10         | 98.3 | 96.5  |

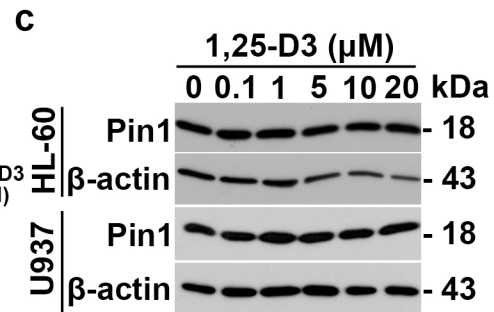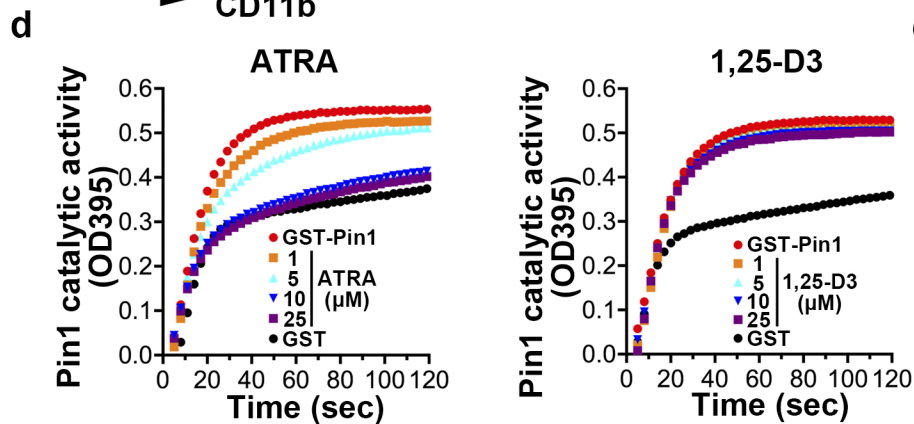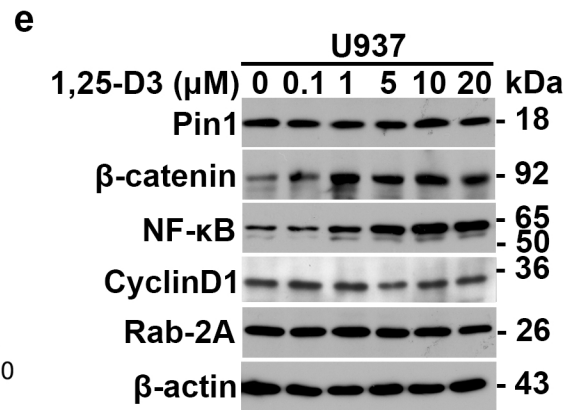

Supplementary Figure 3
