# Supplementary material for: Pin1 inhibition exerts potent activity against acute myeloid leukemia through blocking multiple cancer-driving pathways
Source: Springer Nature journal article supplement (doi:10.1186/s13045-018-0611-7), 2018-05-30
Supplement: MOESM4 [file 15806050]

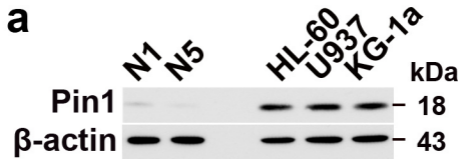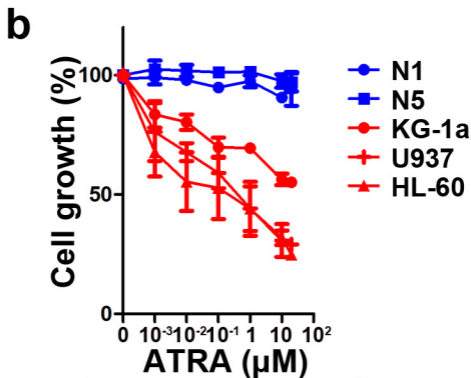

**Supplementary Figure 4**
